# Supplementary material
Source: Elsevier journal article supplement (https://www.sciencedirect.com/science/article/pii/S0021755717311683)
Supplement: mmc2 [file S0021755717311683:mmc2.docx]

Supplemental Table 1 - Pearson’s rank correlation coefficients for tracking of secretory phospholipase A2 (sPLA2) enzyme activity levels from childhood (1980) to adulthood (2001) in the Cardiovascular Risk in Young Finns Study (N in parentheses)a.

|  |  |  |  |  | Age in 1980 (years) | | | | | | |  |  |  |  |
| --- | --- | --- | --- | --- | --- | --- | --- | --- | --- | --- | --- | --- | --- | --- | --- |
|  |  |  |  |  |  |  |  |  |  |  |  |  |  |  |  |
|  |  |  | 3 |  | 6 |  | 9 |  | 12 |  | 15 |  | 18 |  | Allb |
| sPLA2 enzyme activity | |  |  |  |  |  |  |  |  |  |  |  |  |  |  |
|  | Males |  | 0.44 (150) |  | 0.44 (137) |  | 0.33 (175) |  | 0.34 (165) |  | 0.43 (175) |  | 0.31 (160) |  | 0.39 (962) |
|  | Females |  | 0.25 (82) |  | 0.35 (114) |  | 0.44 (129) |  | 0.52 (158) |  | 0.58 (156) |  | 0.28 (134) |  | 0.45 (773) |
|  |  |  |  |  |  |  |  |  |  |  |  |  |  |  |  |

a All p < 0.001.

b Adjusted for age.

**Supplemental Table 2 - Proportions of participants remaining in sPLA2 enzyme activity from childhood to adulthood.**

|  |  | Adult quarter (Q) | | | |
| --- | --- | --- | --- | --- | --- |
|  | Child quarter | Q1 | Q2 | Q3 | Q4 |
| Male | Q1 | 101 (41.2) | 75 (30.6) | 49 (20.0) | 20 (8.2) |
|  | Q2 | 76 (31.7) | 68 (28.3) | 59 (24.6) | 37 (15.4) |
|  | Q3 | 41 (17.2) | 57 (24.0) | 63 (26.5) | 77 (32.4) |
|  | Q4 | 29 (12.1) | 39 (16.3) | 70 (29.3) | 101 (42.3) |
| Females | Q1 | 90 (48.4) | 51 (27.4) | 32 (17.2) | 13 (7.0) |
|  | Q2 | 59 (30.7) | 60 (31.3) | 47 (24.5) | 26 (13.5) |
|  | Q3 | 37 (18.1) | 54 (26.3) | 67 (32.7) | 47 (22.9) |
|  | Q4 | 22 (11.6) | 41 (21.6) | 59 (31.1) | 68 (35.8) |
| All | Q1 | 191 (44.3) | 126 (29.2) | 81 (18.8) | 33 (7.7) |
|  | Q2 | 135 (31.3) | 128 (29.6) | 106 (24.5) | 63 (14.6) |
|  | Q3 | 78 (17.6) | 111 (25.1) | 130 (29.4) | 124 (28.0) |
|  | Q4 | 51 (11.9) | 80 (18.7) | 129 (30.1) | 169 (39.4) |

Note: Data are N (percent).

**Supplemental Table 3 - Comparison of rank correlation coefficients for 21-year tracking of cardiovascular risk variables in the Cardiovascular Risk in Young Finns Study.**

| Variable |  | r |  |
| --- | --- | --- | --- |
| High-density lipoprotein cholesterola |  | 0.49 |  |
| Low-density lipoprotein cholesterola |  | 0.47 |  |
| Body mass indexa |  | 0.39 |  |
| Systolic blood pressurea |  | 0.30 |  |
| High-sensitivity C-reactive proteina |  | 0.29 |  |
| sPLA2 enzyme activityb |  | 0.43 |  |

a Reported in Juonala et al.[16]

b Current study.
